# Supplementary material for: Period Analysis of Intraracial Differences in Incidence and Survival Rates in Epithelial Ovarian Cancer
Source: Hindawi journal article supplement (doi:10.1155/2021/8032209), 2021-12-08
Supplement: f1 [file 8032209.f1.docx]

**A widened difference of incidence and survival between different races in epithelial ovarian cancer: a period analysis.**

Lili Han1,*, Sulaiya Husaiyin1,*, Jing Liu1,*, Miherinisha Maimaiti1, Mayinuer Niyazi1,#，Li Li2,#

1Department of Gynecology, People’s Hospital of Xinjiang Uygur Autonomous Region

2Department of Gynecology, Tumor Hospital of Xinjiang Medical University

*These authors have contributed equally to this work.

#Correspondence to Li Li, email: Lili89650@163.com, and Mayinuer Niyazi, email: Mayinuer1299@163.com

*These authors have contributed equally to this work.

**Supplementary Figure S1**





**Supplementary Figure S1:** Distribution of socioeconomic status by race for patients with epithelial ovarian cancer at 18 SEER sites from 1974 to 2013. Percentage (a) and number (b) of patients with epithelial ovarian cancer in low-poverty, medium-poverty, and high-poverty groups.

**Supplementary Table S1.** The incidence of epithelial ovarian cancer according to age group and decade within race, and SES groups from 1974 to 2013 at the nine original SEER sites. Data are incidence per 100,000 people by the year of diagnosis, with the number of patients in parentheses.

| Age | |  | | Decade | | |
| --- | --- | --- | --- | --- | --- | --- |
| Variable Groups | | 1974-1983 | 1984-1993 | | 1994-2003 | 2004-2013 |
| Total | All | 11.4（11273） | 11.5（13307） | | 10.4（14155） | 9.0（14534） |
|  | 0-44 | 2.4（1357） | 2.0（1517） | | 1.7（1485） | 1.6（1314） |
|  | 45-54 | 18.7（2130） | 16.9（2009） | | 15.7（2777） | 14.0（2963） |
|  | 55-69 | 32.2（4580） | 33.1（5058） | | 29.5（4650） | 24.8（5474） |
|  | 70+ | 36.9（3206） | 42.2（4723） | | 39.1（5243） | 33.5（4783） |
| Race |  |  |  | |  |  |
| white | All | 11.9（10314） | 12.2（11939） | | 11.0（12176） | 9.6（12012） |
|  | 0-44 | 2.5（1186） | 2.1（1308） | | 1.8（1179） | 1.6（988） |
|  | 45-54 | 19.8（1921） | 18.0（1761） | | 16.6（2313） | 14.7（2352） |
|  | 55-69 | 33.7（4199） | 35.3（4515） | | 31.6（4008） | 26.4（4539） |
|  | 70+ | 38.1（3008） | 44.2（4355） | | 41.0（4676） | 35.6（4133） |
|  |  |  |  | |  |  |
| Black | All | 8.0（592） | 7.5（714） | | 7.7（930） | 7.0（1143） |
|  | 0-44 | 1.7（103） | 1.0（90） | | 1.1（124） | 1.0（120） |
|  | 45-54 | 11.2（109） | 10.3（117） | | 9.3（177） | 8.7（226） |
|  | 55-69 | 22.4（242） | 21.6（279） | | 20.6（300） | 20.8（472） |
|  | 70+ | 29.4（138） | 30.9（228） | | 34.6（329） | 28.7（325） |
|  |  |  |  | |  |  |
| Other | All | 7.3（367） | 7.9（654） | | 8.0（1049） | 7.1（1379） |
|  | 0-44 | 1.8（68） | 1.8（119） | | 1.9（182） | 1.7（206） |
|  | 45-54 | 14.2（100） | 13.4（131） | | 15.6（287） | 14.5（385） |
|  | 55-69 | 19.5（139） | 22.4（264） | | 21.2（342） | 17.6（463） |
|  | 70+ | 19.7（60） | 24.5（140） | | 22.6（238） | 21.1（325） |
| SES | All |  |  | |  |  |
| Low Poverty | 11.8（6393） | 12.0（7739） | | 10.7（8392） | 9.0（8754） |
|  | 0-44 | 2.5（760） | 2.1（902） | | 1.7（863） | 1.5（758） |
|  | 45-54 | 19.8（1233） | 17.4（1168） | | 16.2（1663） | 14.1（1826） |
|  | 55-69 | 33.4（2580） | 34.9（2932） | | 30.2（2717） | 24.9（3269） |
|  | 70+ | 38.3（1820） | 43.7（2737） | | 40.5（3149） | 33.6（2901） |
| Medium Poverty | All | 10.9（4687） | 10.9（5320） | | 10.1（5460） | 9.1（5470） |
|  | 0-44 | 2.3（558） | 1.8（625） | | 1.7（585） | 1.6（530） |
|  | 45-54 | 17.4（853） | 16.3（802） | | 15.3（1066） | 13.9（1083） |
|  | 55-69 | 31.0（1927） | 31.3（2039） | | 28.7（1821） | 24.8（2065） |
|  | 70+ | 35.7（1349） | 40.4（1896） | | 37.3（1988） | 33.9（1792） |
| High Poverty | All | 9.5（185） | 9.4（246） | | 8.8（300） | 7.1（303） |
|  | 0-44 | 2.9（35） | 1.8（32） | | 1.8（37） | 1.3（25） |
|  | 45-54 | 17.9（42） | 13.7（39） | | 11.1（48） | 10.1（53） |
|  | 55-69 | 24.7（71） | 23.6（86） | | 25.5（112） | 22.7（137） |
|  | 70+ | 24.1（37） | 38.2（89） | | 33.4（103） | 23.2（88） |

Abbreviation: SES, socioeconomic status.

**Supplementary Table S2**. 12-month, 60-month and 120-month relative survival rates of epithelial ovarian cancer patients according to SES, age group, and calendar period from 1974 to 2013 at eighteen SEER sites. Data are means ± standard error of the mean, with the number of patients in parentheses.

|  |  | **SES** | | | | |
| --- | --- | --- | --- | --- | --- | --- |
| **Decade** | **Age Group** | **Low Poverty** | | **Medium Poverty** | **High Poverty** | |
| 74-83 | 12-Mo RS |  |  | | |  |
|  | All | 65.2 ± 0.6 (6518) | 62.3± 0.7 (4811)** | | | 61.0 ± 3.6 (184) |
|  | 0-44 | 86.9 ± 1.2 (770) | 85.0 ± 1.5 (570) | | | 83.0 ± 6.4 (35) |
|  | 45-54 | 79.0 ± 1.2 (1271) | 77.3 ± 1.4 (880) | | | 73.4 ± 6.9 (41) |
|  | 55-69 | 67.2± 0.9 (2634) | 62.9 ± 1.1 (1983)** | | | 62.6 ± 5.8 (71) |
|  | 70+ | 43.3 ± 1.2 (1843) | 42.1 ± 1.4 (1378) | | | 22.6 ± 7.1 (37)*** |
|  | 60-Mo RS |  |  | | |  |
|  | All | 32.2 ± 0.6 | 32.1 ± 0.7 | | | 35.4 ± 3.7 |
|  | 0-44 | 61.7 ± 1.8 | 63.1 ± 2.1 | | | 57.5 ± 8.4 |
|  | 45-54 | 43.0 ± 1.4 | 40.2 ± 1.7 | | | 34.9 ± 7.6 |
|  | 55-69 | 28.3 ± 0.9 | 28.1 ± 1.1 | | | 34.2 ± 5.9 |
|  | 70+ | 17.3 ± 1.0 | 19.4 ± 1.3 | | | 15.0 ± 6.2 |
|  | 120-Mo RS |  |  | | |  |
|  | All | 27.2 ± 0.6 | 26.6 ± 0.7 | | | 30.4 ± 3.7 |
|  | 0-44 | 55.4 ± 1.8 | 57.4 ± 2.1 | | | 49.4 ± 8.6 |
|  | 45-54 | 36.9 ± 1.7 | 34.0 ± 1.7 | | | 28.2 ± 7.3 |
|  | 55-69 | 22.4 ± 0.9 | 21.5 ± 1.0 | | | 30.2 ± 5.9*** |
|  | 70+ | 14.7 ± 1.2 | 15.2 ± 1.4 | | | 12.7 ± 7.0 |
| 84-93 | 12-Mo RS |  |  | | |  |
|  | All | 71.0 ± 0.5 (7832) | 68.4± 0.6 (6170) | | | 68.4 ± 3.0 (256) |
|  | 0-44 | 90.6 ± 1.0 (918) | 89.2 ± 1.2 (695) | | | 100 ± 0.0 (34) |
|  | 45-54 | 85.1 ± 1.0 (1183) | 86.9 ± 1.1 (937) | | | 83.2 ± 5.9 (41) |
|  | 55-69 | 77.2 ± 0.8 (2958) | 72.6 ± 0.9 (2332)*** | | | 69.3 ± 5.1 (86) |
|  | 70+ | 51.6 ± 1.0 (2773) | 49.3 ± 1.1 (2206) | | | 49.5 ± 5.4 (95) |
|  | 60-Mo RS |  |  | | |  |
|  | All | 35.1 ± 0.6 | 33.6 ± 0.6 | | | 32.5 ± 3.1 |
|  | 0-44 | 64.1 ± 1.6 | 62.4 ± 1.9 | | | 62.1 ± 8.4 |
|  | 45-54 | 47.5 ± 1.5 | 51.6 ± 1.7 | | | 42.2 ± 7.8 |
|  | 55-69 | 34.7 ± 0.9 | 31.0 ± 1.0** | | | 28.4 ± 5.1 |
|  | 70+ | 19.9 ± 0.9 | 18.9 ± 1.0 | | | 21.0 ± 4.8 |
|  | 120-Mo RS |  |  | | |  |
|  | All | 27.9 ± 0.6 | 26.8 ± 0.6 | | | 27.0 ± 3.1 |
|  | 0-44 | 57.0 ± 1.7 | 55.3 ± 1.9 | | | 62.1 ± 8.4 |
|  | 45-54 | 37.9 ± 1.5 | 42.1 ± 1.7* | | | 33.4 ± 7.7 |
|  | 55-69 | 26.1 ± 0.9 | 23.7 ± 1.0 | | | 22.3 ± 4.8 |
|  | 70+ | 14.9 ± 0.9 | 13.5 ± 1.0 | | | 13.0 ± 4.7 |
| 94-03 | 12-Mo RS |  |  | | |  |
|  | All | 76.9 ± 0.4 (11570) | 73.4 ± 0.4 (14676)*** | | | 71.0 ± 1.2 (1430)*** |
|  | 0-44 | 92.3 ± 0.8 (1220) | 87.4 ± 0.8 (1590)*** | | | 84.3 ± 2.9 (164)** |
|  | 45-54 | 90.0 ± 0.6 (2282) | 87.9 ± 0.6 (2857)* | | | 84.8± 2.3 (246)** |
|  | 55-69 | 83.1± 0.6 (3834) | 79.6± 0.6 (4891)*** | | | 79.6 ± 1.8 (501)* |
|  | 70+ | 59.7 ± 0.8 (4234) | 55.5 ± 0.7 (5334)*** | | | 51.8 ± 2.3 (519)** |
|  | 60-Mo RS |  |  | | |  |
|  | All | 42.6 ± 0.5 | 40.5 ± 0.4*** | | | 36.0 ± 1.4** |
|  | 0-44 | 67.9 ± 1.4 | 61.5 ± 1.2*** | | | 58.3 ± 3.9*** |
|  | 45-54 | 56.5 ± 1.1 | 55.0 ± 1.0 | | | 48.6 ± 3.2** |
|  | 55-69 | 44.1 ± 0.8 | 41.3 ± 0.7 | | | 37.8 ± 2.3* |
|  | 70+ | 25.5 ± 0.8 | 24.8 ± 0.7 | | | 20.3 ± 2.1 |
|  | 120-Mo RS |  |  | | |  |
|  | All | 31.9 ± 0.5 | 30.4 ± 0.4 | | | 26.0 ± 1.3** |
|  | 0-44 | 58.0 ± 1.5 | 51.1 ± 1.3*** | | | 45.9 ± 4.0*** |
|  | 45-54 | 43.8 ± 1.1 | 42.7 ± 1.0 | | | 40.7 ± 3.2 |
|  | 55-69 | 31.7 ± 0.8 | 29.6 ± 0.7 | | | 24.7 ± 2.1* |
|  | 70+ | 16.8 ± 0.8 | 17.4 ± 0.7 | | | 12.5 ± 2.0** |
| 04-13 | 12-Mo RS |  |  | | |  |
|  | All | 79.0 ± 0.3 (15475) | 76.0 ± 0.3 (21727)*** | | | 70.1 ± 0.9 (2969)*** |
|  | 0-44 | 93.4 ± 0.7 (1395) | 89.9 ± 0.7 (2256)*** | | | 87.9 ± 2.0 (287)** |
|  | 45-54 | 91.2 ± 0.5 (3260) | 88.0 ± 0.5 (4401)*** | | | 84.1 ± 1.7 (527)** |
|  | 55-69 | 85.8 ± 0.5 (5794) | 82.3 ± 0.4 (7928)*** | | | 75.8 ± 1.3 (1123)*** |
|  | 70+ | 59.2 ± 0.7 (5026) | 57.2 ± 0.6 (7142)* | | | 52.0 ± 1.7 (1032)*** |
|  | 60-Mo RS |  |  | | |  |
|  | All | 45.6 ± 0.5 | 44.3 ± 0.4*** | | | 37.8 ± 1.1*** |
|  | 0-44 | 70.5 ± 1.5 | 69.9 ± 1.2 | | | 64.1 ± 3.5*** |
|  | 45-54 | 59.2 ± 1.1 | 57.5 ± 0.9*** | | | 47.4 ± 2.7** |
|  | 55-69 | 48.1 ± 0.8 | 45.5 ± 0.7*** | | | 40.0 ± 1.8*** |
|  | 70+ | 26.1 ± 0.9 | 25.9 ± 0.7 | | | 23.5 ± 1.8 |
|  | 120-Mo RS |  |  | | |  |
|  | All | 35.0 ± 0.7 | 33.8 ± 0.6 | | | 28.6 ± 1.5*** |
|  | 0-44 | 57.8 ± 2.2 | 60.5 ± 1.6*** | | | 56.4 ± 4.2* |
|  | 45-54 | 47.0 ± 1.4 | 46.0 ± 1.3 | | | 38.6 ± 3.2 |
|  | 55-69 | 37.3 ± 1.2 | 34.7 ± 1.0 | | | 31.2 ± 2.4* |
|  | 70+ | 17.5 ± 1.2 | 19.9 ± 1.0 | | | 17.4 ± 2.5 |

Abbreviations: Mo, month; RS, relative survival; SEM, standard error of the mean.

**p* < 0.01, ***p* < 0.001, and ****p* < 0.0001 for comparisons with the White group.
